# Supplementary material for: Bimetallic-induced tail-to-tail dimerization and C–H activation of methyl acrylateElectronic supplementary information (ESI) available: preparation and selected data for 2 and 3. See http://www.rsc.org/suppdata/cc/b1/b107827p/Dedicated to Prof. C. Moïse (Dijon) on the occasion of his 60th birthday, with our warmest wishes.
Source: Royal Society of Chemistry journal article supplement (doi:10.1039/b107827p), 2001-11-07
Supplement: b107827p.doc [file b107827p.doc]

**Electronic supplementary information**

Bimetallic-Induced Tail-to-Tail Dimerization and C-H Activation of Methyl Acrylate.

__________________________________________________________________

**Pierre Braunstein,**a* Michael J. Chetcuti**a* and Richard Welter*b***

*a Laboratoire de Chimie de Coordination, UMR CNRS 7513*

*Université Louis Pasteur, 4 rue Blaise Pascal, F-67070 Strasbourg Cédex, France. E-mail: braunst@chimie.u-strasbg.fr; chetcuti@chimie.u-strasbg.fr*

*b Groupe Composés métalliques et densités électroniques, UMR CNRS 7513, Université Louis Pasteur, 4 rue Blaise Pascal, F-67070 Strasbourg Cédex, France*

*Experimental Section*

Reactions were carried out under N2, in rigourously deoxygenated solvents. Methyl acrylate was purchased from Aldrich and stored at -20 °C. Prior to use, it was subjected to three freeze-thaw-degas cycles and then trap-to trap distilled. NMR spectra were recorded in CDCl3 on a Bruker AM300 or 500ARX instrument. Resonances are singlets unless otherwise stated. Chemical shifts (in ppm) were referenced to residual CHCl3 set at **7.26 (for the 1H NMR spectra) and to the *C*DCl3 signal (set at **77.24) for the 13C NMR spectra. All coupling constants are in Hz. IR spectra were recorded in the 4000-400 cm-1 range on a Bruker IFS66 FT instrument.

*Reaction of [Cp*Ni=Mo(µ-CO)(CO)2Cp] (****1****) with CH2=CHCO2Me.*

Complex **1** (0.385 g, 0.88 mmol) was dissolved in 25 mL THF and a large excess (1.0 mL) of CH2=CHCO2Me was added. There was no obvious colour change so the solution was refluxed for 24 h, during which time the deep blue colour of **1** was discharged and gave way to a burgundy solution. The solution was pumped down to dryness under vacuum. A bright yellow material (C5Me5­H) was collected in the trap together with excess CH2=CHCO2Me. The residual solid was then extracted with THF and this solution was then filtered through a Celite pad, concentrated under vacuum and layered with pentane. Yellow crystals of **2** (0.069 g, 0.18 mmol, 20%) deposited slowly over 7 days at ‑30 °C. The solution was removed by syringe, and the crystals of **2** were washed with 2x2 mL of pentane, dried and collected. The mother liquor was again pumped down to dryness under vacuum, and the residue redissolved in 3 mL toluene and subjected to chromatography on an Al2O3 column. Small additional quantities of **2** eluted first with toluene, followed by a dark orange brown band that contained **3**. Trace amounts of a green-blue band which contained the not fully characterized species **4** were eluted with a toluene:CH2Cl2 (1:3) mixture. Dark brown crystals of **3** (0.112 g, 0.16 mmol, 18% based on Ni) were recrystallized from toluene:pentane mixtures.

Selected data:

[Mo(CO)2Cp{3-(MeO2C)*C*H–*C*H–*C*HCH2(CO2Me)] (**2**):

Anal. Calcd. (found): C, 62.48 (62.73); H, 4.02 (3.86). IR (CH2Cl2): (CO) = 1963vs, 1883s, 1736m, 1706m. The numbering scheme used for the NMR spectra is the same as shown in Fig.1. Peak assignments were corroborated by INEPT and by HSC 13C-1H and 2-D COSY NMR. The major to minor isomer ratio, believed to be *exo*- and *endo*-isomers of **2**, is 5:2 in CDCl3 at 20 °C.

*Exo* isomer: 1H NMR: **= 5.320 (5H, Cp), 4.943 (m, 1H, H(4), 3*J*3,4 = 9.0, 3*J*4,5 = 9.9 Hz), 3.731 (3H, H(8)), 3.688 (3H, H(1)), 2.913 (d, 2H, H(6A) and H(6B) (fortuitously coincident), 3*J*5,6 = 7.2 Hz], 2.085 (dt, 1H, H(5),3*J*4,5 = 9.9, 3*J*5,6 = 7.3 Hz], 1.658 (d, 1H, H(3), 3*J*3,4 = 9.0 Hz]; 13C{1H} NMR: **= 238.3 and 236.4 (C(9) and C(10)), 174.9 and 171.6 (C(2) and C(7)), 94.1 (C(11)), 74.0 (C(4)), 56.6 (C(5)), 52.2 (C(8)), 51.9 (C(1)), 43.3 (C(3)), 40.7 (C(6)).

*Endo* isomer: 1H NMR: **= 5.344 (5H, Cp), 4.432 (m, 1H, H(4), 3*J*3,4 ≈ *J*4,5 = 9.5 Hz), 3.722 (3H) and 3.708 (3H) (H(1) and H(8)), 3.319 (m, 1H, H(6A) or H(6B)), 3.048 (m, 1H, H(5)), 3.010 (m, 1H, H(6A) or H(6B)), 2.562 (d, 1H, H(3), 3*J*3,4 = 9.2Hz]; 13C{1H} NMR: **= 240.4 and 238.1 (C(9) and C(10)), 175.5 and 172.6 (C(2) and C(7)), 91.6 (C(11)), 89.9 (C(4)), 52.0 and 51.3 (C(1) and C(8)), 50.9 (C(5)), 40.9 (C(3)), 39.1 (C(6)).

[NiMo2(µ3-CCH2CO2Me)(CO)4Cp*Cp2] (**3**): Anal. Calcd. (found): C, 46.99 (47.16); H 3.90 (4.24). IR (CH2Cl2): (CO) = 1987vs, 1925s, 1873vs, 1814m, 1727vs; 1H NMR: **= 5.41 (5H, C5H5), 5.15 (5H, C5H5), 5.25 and 5.08 (1H each, AB multiplet, CH2, 3*J*AB = 12.9 Hz), 3.66 (3H, CO2Me), 1.759 (15H, C5Me5);13C{1H} NMR: **= 267.9 (µ3-*C*CH2CO2Me), 237.0, 233.4, 231.7, 219.8 (Mo–*C*O's), 171.1 (*C*O2Me), 99.6 (*C5*Me5), 91.9 (C5H5), 90.0 (C5H5), 61.6 (CH2), 51.2 (CO2*Me*), 9.5 (C5*Me5*).

Complex **4**: This species, present in small quantities, could not be crystallized and was not fully characterized. Its 1H NMR spectrum gave no observable signals in the 0-10 ppm range which suggested that the species is paramagnetic. A CH2Cl2 solution of **4** showed no strong IR bands in the 2200-1600 cm-1 range, indicating that metal carbonyl and organic C=O bonds were absent.
